# Supplementary material for: Assessing the diet and trophic level of marine fauna in a fishing ground subject to discarding activity using stable isotopes
Source: PLOS journal article supplement (doi:10.1371/journal.pone.0268758), 2022-06-07
Supplement: S1 (10.1371/journal.pone.0268758.s001) [file journal.pone.0268758.s001.pdf]

**S1 Table. Raw stable isotope data.**

| Group          | Genus-species         | $\delta^{13}\text{C}$ (‰) | $\delta^{15}\text{N}$ (‰) | Total length (cm) |
|----------------|-----------------------|---------------------------|---------------------------|-------------------|
| Actinopterygii | <i>C.lyra</i>         | -17.26                    | 13.49                     | 12                |
| Actinopterygii | <i>C.lyra</i>         | -17.45                    | 13.13                     | 12                |
| Actinopterygii | <i>C.lyra</i>         | -17.09                    | 12.11                     | 15                |
| Actinopterygii | <i>C.lyra</i>         | -17.73                    | 12.84                     | 11                |
| Actinopterygii | <i>C.lyra</i>         | -17.31                    | 12.27                     | 20                |
| Actinopterygii | <i>C.lyra</i>         | -17.33                    | 11.88                     | 18                |
| Actinopterygii | <i>C.lyra</i>         | -17.68                    | 12.62                     | 21                |
| Actinopterygii | <i>C.lucerna</i>      | -15.21                    | 15.50                     | 23                |
| Actinopterygii | <i>C.lucerna</i>      | -15.35                    | 15.64                     | 23                |
| Actinopterygii | <i>C.lucerna</i>      | -14.88                    | 15.59                     | 24                |
| Actinopterygii | <i>C.lucerna</i>      | -15.61                    | 14.81                     | 21                |
| Actinopterygii | <i>C.lucerna</i>      | -17.61                    | 15.05                     | 23                |
| Actinopterygii | <i>C.lucerna</i>      | -15.42                    | 15.04                     | 21                |
| Actinopterygii | <i>C.lucerna</i>      | -15.89                    | 15.16                     | 26                |
| Actinopterygii | <i>C.conger</i>       | -15.87                    | 16.36                     | 150               |
| Actinopterygii | <i>C.conger</i>       | -16.62                    | 14.81                     | 114               |
| Actinopterygii | <i>C.conger</i>       | -16.79                    | 16.05                     | 123               |
| Actinopterygii | <i>C.conger</i>       | -17.30                    | 15.23                     | 80                |
| Actinopterygii | <i>C.conger</i>       | -17.05                    | 14.72                     | 76                |
| Actinopterygii | <i>C.conger</i>       | -16.94                    | 14.78                     | 75                |
| Actinopterygii | <i>E.encrasicolus</i> | -18.28                    | 13.63                     | 13                |
| Actinopterygii | <i>E.encrasicolus</i> | -18.12                    | 13.62                     | 13                |
| Actinopterygii | <i>E.encrasicolus</i> | -18.41                    | 13.13                     | 12                |
| Actinopterygii | <i>E.encrasicolus</i> | -17.89                    | 12.09                     | 13                |
| Actinopterygii | <i>E.encrasicolus</i> | -18.36                    | 12.29                     | 14                |
| Actinopterygii | <i>E.encrasicolus</i> | -17.98                    | 12.79                     | 14                |
| Actinopterygii | <i>E.encrasicolus</i> | -18.17                    | 13.34                     | 13                |
| Actinopterygii | <i>S.pilchardus</i>   | -18.24                    | 11.89                     | 21                |
| Actinopterygii | <i>S.pilchardus</i>   | -19.43                    | 12.33                     | 11                |
| Actinopterygii | <i>S.pilchardus</i>   | -18.00                    | 12.39                     | 21                |
| Actinopterygii | <i>S.pilchardus</i>   | -18.39                    | 13.01                     | 21                |
| Actinopterygii | <i>S.pilchardus</i>   | -17.68                    | 13.23                     | 19                |
| Actinopterygii | <i>S.pilchardus</i>   | -17.98                    | 13.85                     | 17                |
| Actinopterygii | <i>S.sprattus</i>     | -19.32                    | 12.58                     | 7                 |
| Actinopterygii | <i>S.sprattus</i>     | -19.26                    | 12.43                     | 8                 |
| Actinopterygii | <i>S.sprattus</i>     | -19.13                    | 12.35                     | 8                 |
| Actinopterygii | <i>S.sprattus</i>     | -19.49                    | 12.06                     | 9                 |
| Actinopterygii | <i>S.sprattus</i>     | -19.47                    | 11.41                     | 9                 |
| Actinopterygii | <i>S.sprattus</i>     | -19.55                    | 11.69                     | 8                 |
| Actinopterygii | <i>S.sprattus</i>     | -18.59                    | 11.56                     | 11                |
| Actinopterygii | <i>S.scombrus</i>     | -17.92                    | 13.44                     | 22                |

|                |                     |        |       |    |
|----------------|---------------------|--------|-------|----|
| Actinopterygii | <i>S.scombrus</i>   | -18.15 | 12.50 | 23 |
| Actinopterygii | <i>S.scombrus</i>   | -18.78 | 11.95 | 22 |
| Actinopterygii | <i>S.scombrus</i>   | -19.27 | 11.44 | 21 |
| Actinopterygii | <i>S.scombrus</i>   | -18.58 | 12.44 | 19 |
| Actinopterygii | <i>S.scombrus</i>   | -18.24 | 11.27 | 22 |
| Actinopterygii | <i>S.scombrus</i>   | -18.78 | 11.46 | 22 |
| Actinopterygii | <i>O.eperlanus</i>  | -16.20 | 16.34 | 13 |
| Actinopterygii | <i>O.eperlanus</i>  | -17.87 | 15.49 | 13 |
| Actinopterygii | <i>O.eperlanus</i>  | -17.88 | 15.16 | 12 |
| Actinopterygii | <i>O.eperlanus</i>  | -17.84 | 15.35 | 12 |
| Actinopterygii | <i>O.eperlanus</i>  | -17.61 | 15.83 | 13 |
| Actinopterygii | <i>O.eperlanus</i>  | -17.16 | 14.98 | 12 |
| Actinopterygii | <i>O.eperlanus</i>  | -17.33 | 15.43 | 13 |
| Actinopterygii | <i>B.belone</i>     | -18.16 | 13.69 | 71 |
| Actinopterygii | <i>B.belone</i>     | -16.80 | 15.34 | 61 |
| Actinopterygii | <i>B.belone</i>     | -17.47 | 12.09 | 71 |
| Actinopterygii | <i>B.belone</i>     | -17.20 | 12.31 | 70 |
| Actinopterygii | <i>T.trachurus</i>  | -18.21 | 15.50 | 28 |
| Actinopterygii | <i>T.trachurus</i>  | -18.36 | 15.57 | 25 |
| Actinopterygii | <i>T.trachurus</i>  | -17.58 | 15.13 | 26 |
| Actinopterygii | <i>T.trachurus</i>  | -18.22 | 13.94 | 26 |
| Actinopterygii | <i>T.trachurus</i>  | -18.35 | 15.40 | 24 |
| Actinopterygii | <i>T.trachurus</i>  | -18.48 | 14.62 | 25 |
| Actinopterygii | <i>T.trachurus</i>  | -17.54 | 14.99 | 27 |
| Actinopterygii | <i>P.pollachius</i> | -18.62 | 14.35 | 27 |
| Actinopterygii | <i>P.pollachius</i> | -18.13 | 14.47 | 42 |
| Actinopterygii | <i>P.pollachius</i> | -15.50 | 15.29 | 23 |
| Actinopterygii | <i>P.pollachius</i> | -16.98 | 15.92 | 27 |
| Actinopterygii | <i>P.pollachius</i> | -17.45 | 14.87 | 41 |
| Actinopterygii | <i>P.pollachius</i> | -16.97 | 15.47 | 41 |
| Actinopterygii | <i>P.pollachius</i> | -17.05 | 15.78 | 24 |
| Actinopterygii | <i>T.luscus</i>     | -16.21 | 16.68 | 15 |
| Actinopterygii | <i>T.luscus</i>     | -16.30 | 16.84 | 17 |
| Actinopterygii | <i>T.luscus</i>     | -15.88 | 15.90 | 21 |
| Actinopterygii | <i>T.luscus</i>     | -17.50 | 14.58 | 16 |
| Actinopterygii | <i>T.luscus</i>     | -16.43 | 15.88 | 20 |
| Actinopterygii | <i>T.luscus</i>     | -17.31 | 15.49 | 17 |
| Actinopterygii | <i>T.luscus</i>     | -17.32 | 14.60 | 16 |
| Actinopterygii | <i>M.merlangus</i>  | -17.37 | 16.72 | 24 |
| Actinopterygii | <i>M.merlangus</i>  | -17.87 | 15.76 | 18 |
| Actinopterygii | <i>M.merlangus</i>  | -17.71 | 16.34 | 24 |
| Actinopterygii | <i>M.merlangus</i>  | -17.36 | 16.72 | 19 |
| Actinopterygii | <i>M.merlangus</i>  | -17.16 | 17.10 | 26 |
| Actinopterygii | <i>M.merlangus</i>  | -17.43 | 17.33 | 29 |
| Actinopterygii | <i>M.merluccius</i> | -18.16 | 14.32 | 25 |

|                |                     |        |       |    |
|----------------|---------------------|--------|-------|----|
| Actinopterygii | <i>M.merluccius</i> | -18.06 | 14.59 | 25 |
| Actinopterygii | <i>M.merluccius</i> | -18.53 | 13.17 | 23 |
| Actinopterygii | <i>M.merluccius</i> | -17.49 | 15.09 | 31 |
| Actinopterygii | <i>M.merluccius</i> | -17.66 | 15.01 | 28 |
| Actinopterygii | <i>M.merluccius</i> | -17.77 | 14.96 | 26 |
| Actinopterygii | <i>M.merluccius</i> | -18.41 | 14.68 | 20 |
| Actinopterygii | <i>P.pagrus</i>     | -17.18 | 15.23 | 21 |
| Actinopterygii | <i>P.pagrus</i>     | -16.09 | 16.42 | 22 |
| Actinopterygii | <i>P.pagrus</i>     | -16.82 | 15.73 | 22 |
| Actinopterygii | <i>P.pagrus</i>     | -16.41 | 15.06 | 21 |
| Actinopterygii | <i>P.pagrus</i>     | -17.22 | 16.04 | 20 |
| Actinopterygii | <i>P.pagrus</i>     | -16.05 | 16.06 | 22 |
| Actinopterygii | <i>P.pagrus</i>     | -16.66 | 16.17 | 21 |
| Actinopterygii | <i>S.cantharus</i>  | -16.78 | 15.50 | 19 |
| Actinopterygii | <i>S.cantharus</i>  | -17.49 | 15.57 | 16 |
| Actinopterygii | <i>S.cantharus</i>  | -15.93 | 16.23 | 18 |
| Actinopterygii | <i>S.cantharus</i>  | -17.67 | 15.41 | 19 |
| Actinopterygii | <i>S.cantharus</i>  | -17.35 | 14.69 | 19 |
| Actinopterygii | <i>S.cantharus</i>  | -16.78 | 14.70 | 20 |
| Actinopterygii | <i>S.cantharus</i>  | -17.03 | 15.27 | 21 |
| Actinopterygii | <i>L.bergylta</i>   | -18.30 | 13.63 | 16 |
| Actinopterygii | <i>L.bergylta</i>   | -18.24 | 13.26 | 14 |
| Actinopterygii | <i>L.bergylta</i>   | -16.22 | 13.71 | 17 |
| Actinopterygii | <i>L.bergylta</i>   | -16.85 | 14.57 | 14 |
| Actinopterygii | <i>S.solea</i>      | -17.13 | 13.79 | 22 |
| Actinopterygii | <i>S.solea</i>      | -16.25 | 14.24 | 23 |
| Actinopterygii | <i>S.solea</i>      | -16.87 | 14.12 | 23 |
| Actinopterygii | <i>S.solea</i>      | -17.26 | 13.56 | 21 |
| Actinopterygii | <i>S.solea</i>      | -16.42 | 13.95 | 25 |
| Actinopterygii | <i>S.solea</i>      | -20.25 | 14.39 | 24 |
| Actinopterygii | <i>S.solea</i>      | -16.32 | 14.67 | 25 |
| Chondrichthyes | <i>R.undulata</i>   | -16.07 | 14.81 | 65 |
| Chondrichthyes | <i>R.undulata</i>   | -15.42 | 14.65 | 57 |
| Chondrichthyes | <i>R.undulata</i>   | -16.35 | 14.51 | 55 |
| Chondrichthyes | <i>R.undulata</i>   | -15.05 | 14.48 | 39 |
| Chondrichthyes | <i>R.undulata</i>   | -15.93 | 14.96 | 48 |
| Chondrichthyes | <i>R.undulata</i>   | -16.86 | 13.66 | 43 |
| Chondrichthyes | <i>R.undulata</i>   | -16.41 | 14.79 | 63 |
| Chondrichthyes | <i>S.canicula</i>   | -16.56 | 14.74 | 57 |
| Chondrichthyes | <i>S.canicula</i>   | -17.15 | 14.02 | 63 |
| Chondrichthyes | <i>S.canicula</i>   | -16.44 | 15.15 | 58 |
| Chondrichthyes | <i>S.canicula</i>   | -16.54 | 14.88 | 50 |
| Chondrichthyes | <i>S.canicula</i>   | -16.76 | 14.59 | 49 |
| Chondrichthyes | <i>S.canicula</i>   | -16.98 | 14.53 | 58 |
| Chondrichthyes | <i>S.canicula</i>   | -17.28 | 14.39 | 50 |

|             |                          |        |       |    |
|-------------|--------------------------|--------|-------|----|
| Cephalopoda | <i>Alloteuthis.spp</i>   | -18.67 | 14.51 | 7  |
| Cephalopoda | <i>Alloteuthis.spp</i>   | -18.68 | 13.84 | 8  |
| Cephalopoda | <i>Alloteuthis.spp</i>   | -18.92 | 13.91 | 7  |
| Cephalopoda | <i>Alloteuthis.spp</i>   | -19.11 | 13.50 | 7  |
| Cephalopoda | <i>Alloteuthis.spp</i>   | -17.98 | 17.02 | 9  |
| Cephalopoda | <i>Alloteuthis.spp</i>   | -18.05 | 15.60 | 7  |
| Cephalopoda | <i>Alloteuthis.spp</i>   | -19.01 | 13.96 | 8  |
| Cephalopoda | <i>S.officinalis</i>     | -17.08 | 14.29 | 11 |
| Cephalopoda | <i>S.officinalis</i>     | -17.63 | 14.33 | 12 |
| Cephalopoda | <i>S.officinalis</i>     | -17.38 | 14.81 | 14 |
| Cephalopoda | <i>S.officinalis</i>     | -17.41 | 14.59 | 12 |
| Cephalopoda | <i>S.officinalis</i>     | -17.27 | 15.40 | 9  |
| Cephalopoda | <i>S.officinalis</i>     | -17.19 | 14.39 | 7  |
| Cephalopoda | <i>S.officinalis</i>     | -17.17 | 14.80 | 10 |
| Decapoda    | <i>A.undecimdentatus</i> | -16.20 | 12.26 | 5  |
| Decapoda    | <i>A.undecimdentatus</i> | -17.93 | 12.88 | 5  |
| Decapoda    | <i>A.undecimdentatus</i> | -16.40 | 12.05 | 7  |
| Decapoda    | <i>A.undecimdentatus</i> | -16.87 | 12.04 | 6  |
| Decapoda    | <i>A.undecimdentatus</i> | -17.28 | 12.04 | 6  |
| Decapoda    | <i>A.undecimdentatus</i> | -17.34 | 12.92 | 6  |
| Decapoda    | <i>A.undecimdentatus</i> | -17.96 | 12.40 | 6  |
| Decapoda    | <i>A.undecimdentatus</i> | -16.07 | 13.25 | 6  |
| Decapoda    | <i>A.undecimdentatus</i> | -17.90 | 12.83 | 4  |
| Decapoda    | <i>C.pagurus</i>         | -16.83 | 13.72 | 15 |
| Decapoda    | <i>C.pagurus</i>         | -17.42 | 13.35 | 11 |
| Decapoda    | <i>C.pagurus</i>         | -16.53 | 15.11 | 15 |
| Decapoda    | <i>C.pagurus</i>         | -17.30 | 13.27 | 11 |
| Decapoda    | <i>C.pagurus</i>         | -17.85 | 13.81 | 12 |
| Decapoda    | <i>C.pagurus</i>         | -17.13 | 14.53 | 10 |
| Decapoda    | <i>C.pagurus</i>         | -17.93 | 13.49 | 9  |
| Decapoda    | <i>N.puber</i>           | -17.08 | 13.42 | 6  |
| Decapoda    | <i>N.puber</i>           | -17.37 | 14.04 | 6  |
| Decapoda    | <i>N.puber</i>           | -16.61 | 12.63 | 5  |
| Decapoda    | <i>N.puber</i>           | -16.80 | 12.36 | 6  |
| Decapoda    | <i>N.puber</i>           | -16.78 | 12.33 | 6  |
| Decapoda    | <i>N.puber</i>           | -16.71 | 13.04 | 7  |
| Decapoda    | <i>N.puber</i>           | -16.68 | 12.75 | 7  |
| Decapoda    | <i>M.brachydactyla</i>   | -17.09 | 13.73 | 13 |
| Decapoda    | <i>M.brachydactyla</i>   | -16.37 | 13.47 | 12 |
| Decapoda    | <i>M.brachydactyla</i>   | -16.31 | 13.60 | 12 |
| Decapoda    | <i>M.brachydactyla</i>   | -17.06 | 11.78 | 11 |
| Decapoda    | <i>M.brachydactyla</i>   | -16.86 | 13.82 | 11 |
| Decapoda    | <i>M.brachydactyla</i>   | -16.88 | 13.07 | 12 |
| Decapoda    | <i>M.brachydactyla</i>   | -17.35 | 13.66 | 14 |
| Decapoda    | <i>Pagurus.spp</i>       | -15.40 | 12.62 | NA |

|            |                    |        |       |    |
|------------|--------------------|--------|-------|----|
| Decapoda   | <i>Pagurus.spp</i> | -16.97 | 12.45 | NA |
| Decapoda   | <i>Pagurus.spp</i> | -16.39 | 12.86 | NA |
| Decapoda   | <i>Pagurus.spp</i> | -15.99 | 13.07 | NA |
| Decapoda   | <i>Pagurus.spp</i> | -16.29 | 13.03 | NA |
| Decapoda   | <i>Pagurus.spp</i> | -16.24 | 13.08 | NA |
| Decapoda   | <i>Pagurus.spp</i> | -16.11 | 13.27 | NA |
| Decapoda   | <i>Crangon.spp</i> | -15.71 | 13.91 | NA |
| Decapoda   | <i>Crangon.spp</i> | -15.05 | 13.65 | NA |
| Decapoda   | <i>Crangon.spp</i> | -13.47 | 13.68 | NA |
| Decapoda   | <i>Crangon.spp</i> | -16.63 | 14.10 | NA |
| Decapoda   | <i>Crangon.spp</i> | -15.83 | 13.67 | NA |
| Decapoda   | <i>Crangon.spp</i> | -14.02 | 14.07 | NA |
| Decapoda   | <i>Crangon.spp</i> | -16.29 | 14.12 | NA |
| Polychaeta | <i>A.aculeata</i>  | -17.15 | 13.55 | 8  |
| Polychaeta | <i>A.aculeata</i>  | -16.71 | 14.42 | 6  |
| Polychaeta | <i>A.aculeata</i>  | -16.49 | 14.57 | 6  |
| Polychaeta | <i>A.aculeata</i>  | -17.55 | 12.75 | 8  |
| Polychaeta | <i>A.aculeata</i>  | -16.30 | 14.00 | 8  |
| Polychaeta | <i>A.aculeata</i>  | -15.49 | 13.02 | 7  |
| Gastropoda | <i>B.undatum</i>   | -16.22 | 12.92 | 7  |
| Gastropoda | <i>B.undatum</i>   | -15.84 | 13.09 | 6  |
| Gastropoda | <i>B.undatum</i>   | -17.12 | 12.76 | 7  |
| Gastropoda | <i>B.undatum</i>   | -17.04 | 13.78 | 7  |
| Gastropoda | <i>B.undatum</i>   | -16.33 | 13.84 | 8  |
| Gastropoda | <i>B.undatum</i>   | -16.04 | 14.52 | 7  |
| Gastropoda | <i>B.undatum</i>   | -16.11 | 12.93 | 7  |
| Bivalvia   | <i>P.maximus</i>   | -17.92 | 10.38 | 12 |
| Bivalvia   | <i>P.maximus</i>   | -17.88 | 9.89  | 12 |
| Bivalvia   | <i>P.maximus</i>   | -18.14 | 9.72  | 12 |
| Bivalvia   | <i>P.maximus</i>   | -17.75 | 10.17 | 12 |
| Bivalvia   | <i>P.maximus</i>   | -17.75 | 9.85  | 13 |
| Bivalvia   | <i>P.maximus</i>   | -18.12 | 9.75  | 12 |
| Bivalvia   | <i>P.maximus</i>   | -17.94 | 10.79 | 11 |

---
