# Supplementary material for: Assessing the diet and trophic level of marine fauna in a fishing ground subject to discarding activity using stable isotopes
Source: PLOS journal article supplement (doi:10.1371/journal.pone.0268758), 2022-06-07
Supplement: S2 (10.1371/journal.pone.0268758.s002) [file journal.pone.0268758.s002.pdf]

# UPGMA clustering dendrogram

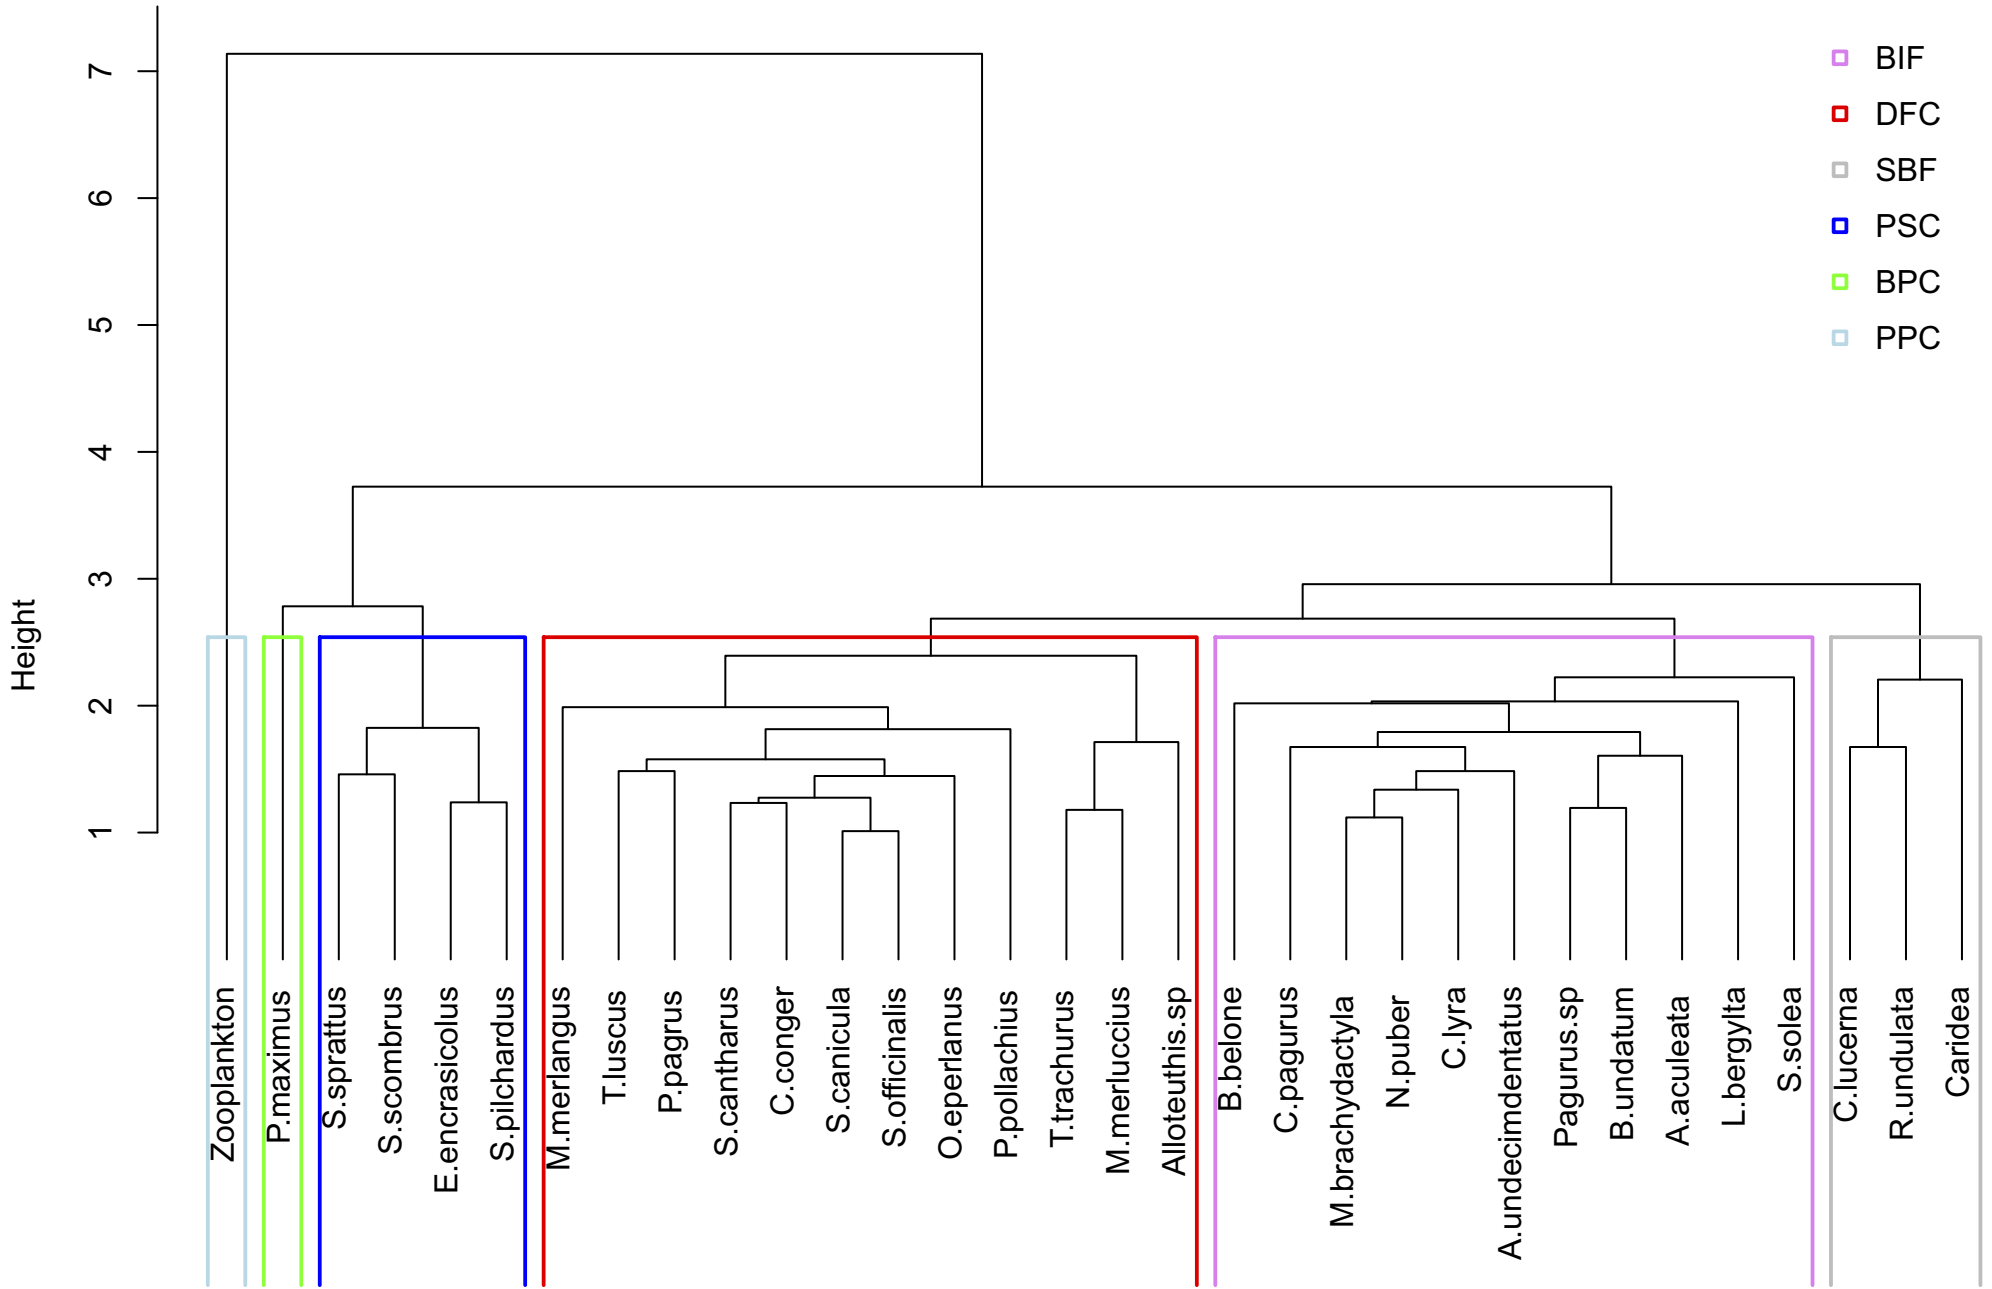

32 taxa  
6 groups
